# Supplementary material
Source: PubMed Central journal article supplement (PMC4713190)

## Table of contents

|                                                      |   |
|------------------------------------------------------|---|
| Table of contents.....                               | 1 |
| 1. General remarks.....                              | 2 |
| 2. $^1\text{H}$ and $^{13}\text{C}$ NMR spectra..... | 3 |
| 3. Crystal packing for compound <b>9</b> .....       | 7 |

## 1. General remarks.

All reagents and solvents were purchased from commercial sources and were used as received unless otherwise noted. Reagent grade solvents ( $\text{CH}_2\text{Cl}_2$ , hexanes) were distilled prior to use. DMF was dried over magnesium sulfate, then distilled and stored under argon. Transformations with moisture and oxygen sensitive compounds were performed under a stream of argon. The reaction progress was monitored by means of thin layer chromatography (TLC), which was performed on aluminium foil plates, covered with Silica gel 60 F<sub>254</sub> (Merck) or Aluminium oxide 60 F<sub>254</sub> (neutral, Merck). Products purification was done by means of column chromatography with Kieselgel 60 (Merck) or Aluminium oxide (Fluka). Occasionally, dry column vacuum chromatography (DCVC) for purification of products obtained was performed using Silica gel Type D 5F. The identity and purity of prepared compounds were proved by <sup>1</sup>H NMR and <sup>13</sup>C NMR spectrometry as well as by MS-spectrometry (*via* EI-MS or ESI-MS). NMR spectra were measured on Bruker AM 500 MHz, Bruker AM 600 MHz, Varian 600 MHz, Varian 400 MHz or Varian 200 MHz instruments with TMS as internal standard. All chemical shifts are given in ppm. All melting points for crystalline products were measured with automated melting point apparatus EZ-MELT and were given without correction. The absorbance and fluorescence spectra were measured in dichloromethane on Perkin – Elmer Lambda 25 UV/VIS and Hitachi F-7000 respectively.

### Linear optical measurements

Steady-state fluorescence measurements were performed with dilute solutions ( $10^{-6}\text{M}$ , optical density < 0.1) contained in standard 1 cm quartz cuvettes at room temperature. Compounds were dissolved in dichloromethane unless otherwise noted. Emission spectra were obtained, for each compound, under excitation at  $\lambda=350$  nm. Fluorescence quantum yields were measured by using quinine hemisulphate monohydrate in 0.5M sulfuric acid as a standard.

## 2. $^1\text{H}$ and $^{13}\text{C}$ NMR spectra

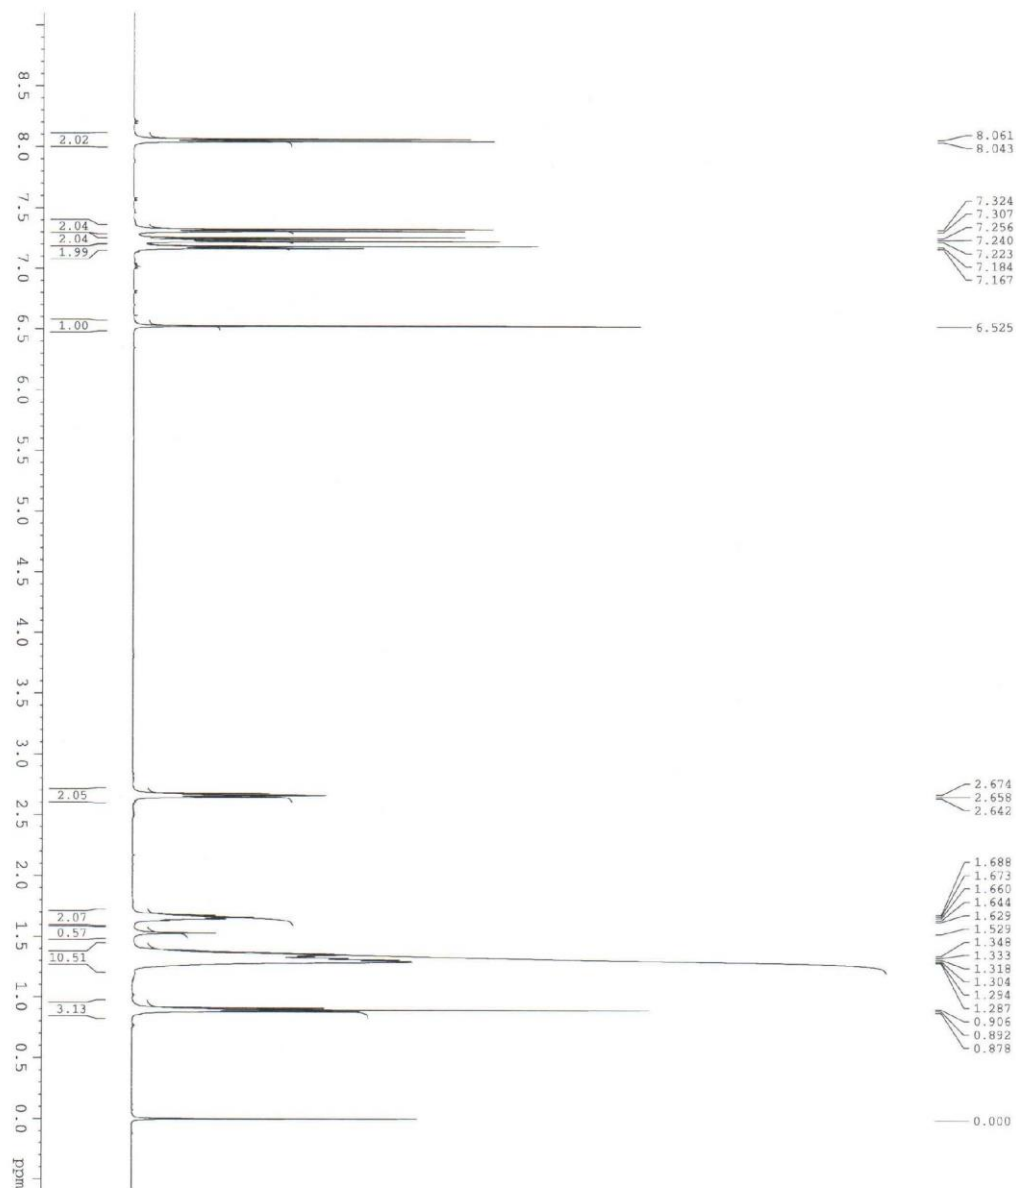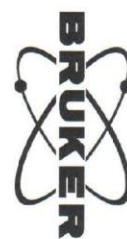

Current Data Parameters  
 NAME 3HP24  
 EXPNO 1  
 PROCNO 1

F2 - Acquisition Parameters  
 Date\_ 20150511  
 time 15.40  
 INSTRUM DRX  
 PROBHD 5 mm TBI 1H/13  
 PULPROG zg  
 TD 65536  
 SOLVENT CDCl3  
 NS 32  
 DS 0  
 SWH 10330.578 Hz  
 FIDRES 0.157632 Hz  
 AQ 3.171923 sec  
 RG 114  
 DW 48.400 usec  
 DE 6.78 usec  
 TE 303.0 K  
 D1 1.00000000 sec  
 T10 1

==== CHANNEL f1 =====  
 NUCL1 1H  
 P1 2.30 usec  
 PL1 0.00 dB  
 SFO1 500.1330885 MHz

F2 - Processing parameters  
 SI 32768  
 SF 500.130259 MHz  
 WDW DO  
 SSB NO  
 LB 0.00 Hz  
 GB 0  
 PC 1.00

$^1\text{H}$  NMR spectrum of compound 6

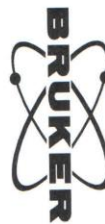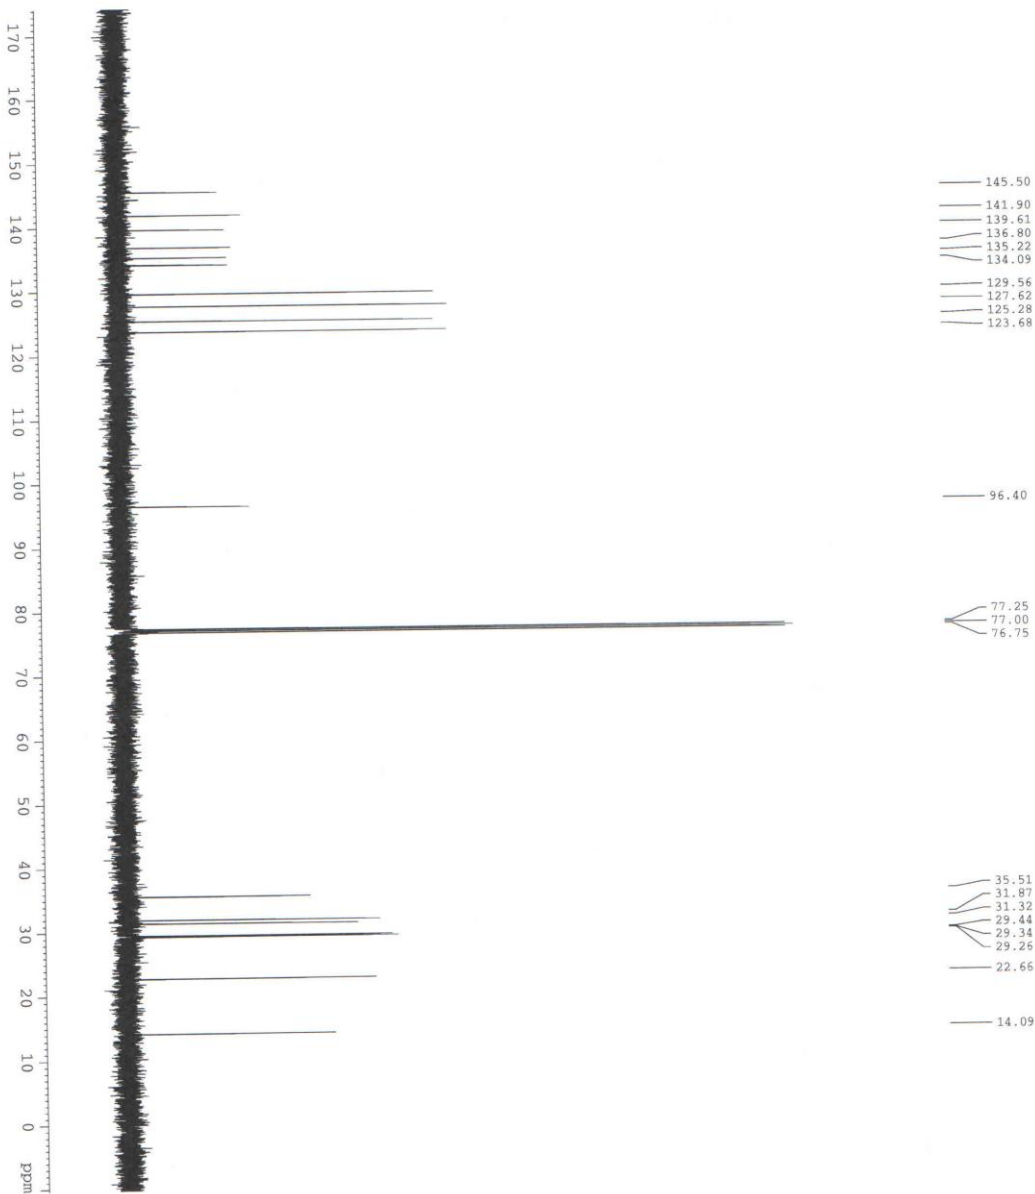

Current Data Parameters  
NAME 3EP24  
EXPTNO 1  
PROCNO 1

F2 - Acquisition Parameters  
Date\_ 20150515  
Time 15:54  
INSTRUM DRX  
PROBHD 5 mm TBI H/13  
PULPROG zgpg30  
TD 65536  
SOLVENT CDCl3  
NS 750  
DS 4  
SWH 32679.738 Hz  
FIDRES 0.498653 Hz  
AQ 1.0027508 sec  
RG 32768  
DW 12.710 usec  
TE 303.0 K  
D1 1.00000000 sec  
d11 0.03000000 sec  
DELTA 0.89999998 sec  
TD0 1

===== CHANNEL F1 =====  
NUC1 13C  
P1 5.00 usec  
PL1 -3.00 dB  
SFO1 125.7703643 MHz

===== CHANNEL F2 =====  
CPDPRG2 waltz16  
NUC2 1H  
PCPD2 98.00 usec  
PL2 3.00 dB  
PL12 23.00 dB  
EL13 500.1320005 MHz  
SFO2 500.1320005 MHz

F1 - Acquisition Parameters  
ND0 1  
TD 128  
SFO1 500.132 MHz  
FIDRES 7.8121414 Hz  
SFO 1.999 ppm  
P1MODE OP

F2 - Processing Parameters  
SI 26214  
SF 125.7577928 MHz  
WDW EM  
SSB 0  
LB 0.50 Hz  
GB 0  
PC 1.40

F1 - Processing Parameters  
SI 1  
SF 500.1300000 MHz  
WDW SINE  
SSB 0  
LB 0.30 Hz  
GB 0.1

<sup>13</sup>C NMR spectrum of compound 6

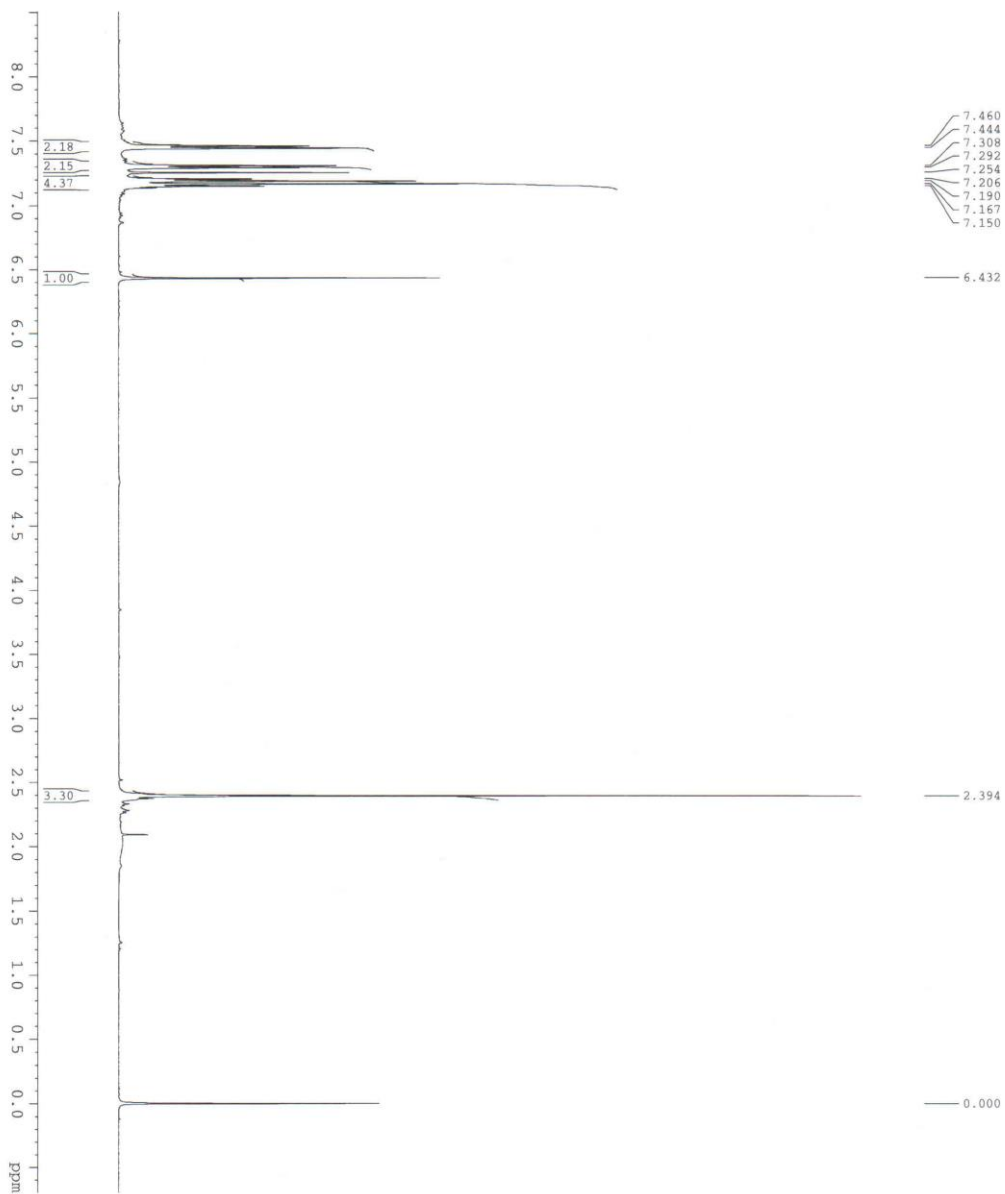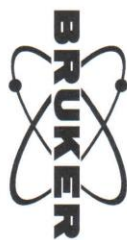

Current Data Parameters  
 NAME MK332  
 EXPNO 1  
 PROCNO 1

F2 - Acquisition Parameters  
 Date\_ 20150504  
 Time 11.01  
 INSTRUM DRX  
 PROBHID 5 mm TBI 1H/13  
 PULPROG zg  
 TD 65536  
 SOLVENT CDCl3  
 NS 32  
 DS 0  
 SMH 10330.578 Hz  
 FIDRES 0.157633 Hz  
 AQ 3.1719923 sec  
 RG 256  
 DE 48.400 usec  
 TE 303.0 K  
 D1 1.00000000 sec  
 TD0 1

===== CHANNEL f1 =====  
 NUC1 1H  
 P1 2.50 usec  
 PL1 0.00 dB  
 SFO1 500.1330885 MHz

F2 - Processing parameters  
 SI 32768  
 SF 500.1300265 MHz  
 WDW no  
 SSB 0  
 LB 0.00 Hz  
 GB 0  
 PC 1.00

<sup>1</sup>H NMR spectrum of compound 7

137.06  
136.97  
136.13  
135.01  
132.68  
130.01  
127.91  
127.80  
127.65  
125.21  
125.13  
125.10  
125.07

95.36

77.25  
77.00  
76.75

21.04

-0.02

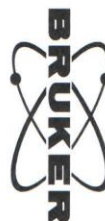

Current Data Parameters  
NAME HK332  
EXPNO 2  
PROCNO 1

F2 - Acquisition Parameters  
Date\_ 20150504  
Time 11.14

INSTRUM DRX  
PROBHD 5 mm TBI 1H/13  
PULPROG zgpg30

TD0 65536  
SOLVENT CDCl3  
NS 1550

DS 4  
SWH 32679.738 Hz  
FIDRES 0.45853 Hz

RO 1.00228 sec  
AQ 5.2728 sec  
RG 15.300 usec

DW 7.10 usec  
DE 303.0 K  
TE 1.00000000 sec

D1 0.03000000 sec  
d11 0.89999999 sec  
TD0 1

===== CHANNEL F1 =====  
NUC1 13C  
P1 5.00 usec  
PL1 -3.00 dB  
SFO1 125.7703643 MHz

===== CHANNEL F2 =====  
CPDPRG2 waltz16  
NUC2 1H  
PCPD2 98.00 usec  
PL2 2.00 dB  
PL3 32.00 dB  
SFO2 500.1320005 MHz

F1 - Acquisition parameters  
ND0 1  
SFO1 500.132 MHz  
FIDRES 7.812500 Hz  
SW 1.999 ppm  
PULPROG OP

F2 - Processing parameters  
SI 1024  
SF 500.1300000 MHz  
WDW SINE  
SSB 0  
LB 0.30 Hz  
GB 0.1

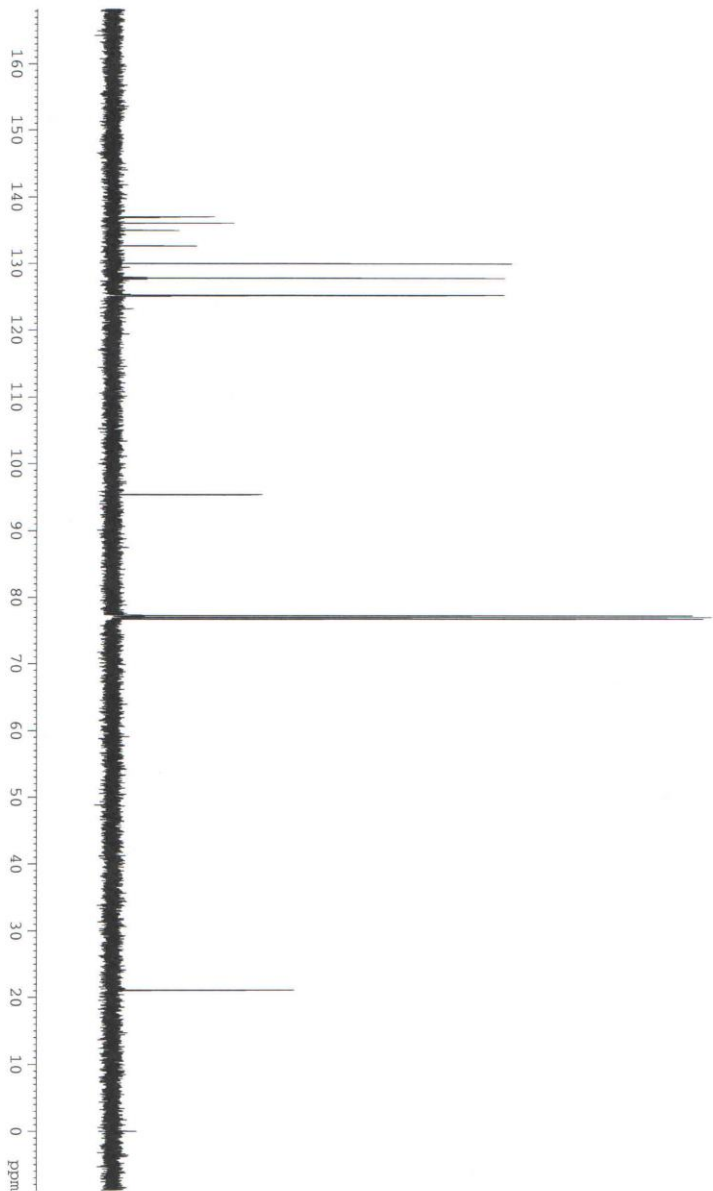

<sup>13</sup>C NMR spectrum of compound 7

### 3. Crystal packing for compound 9.

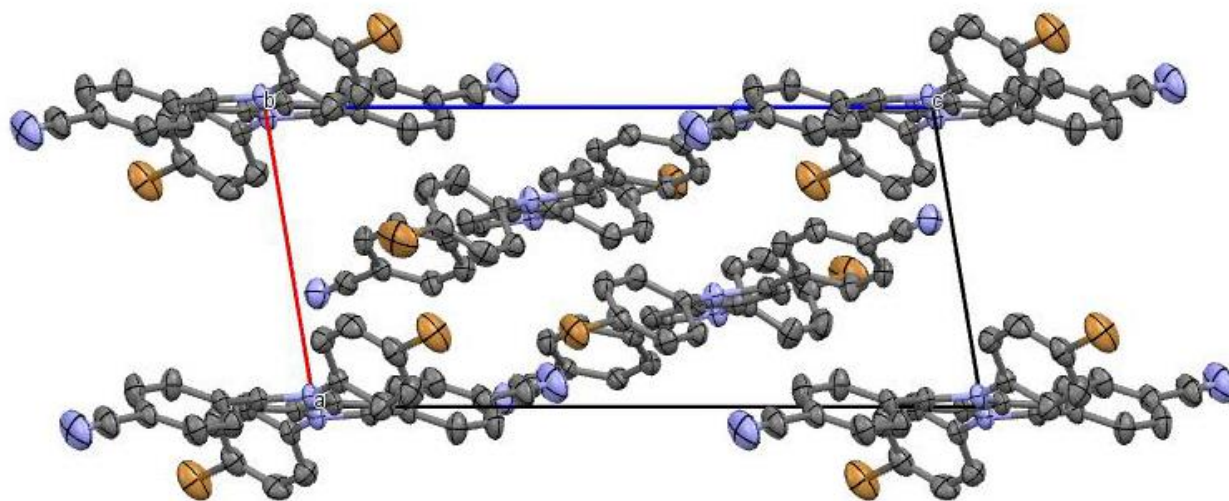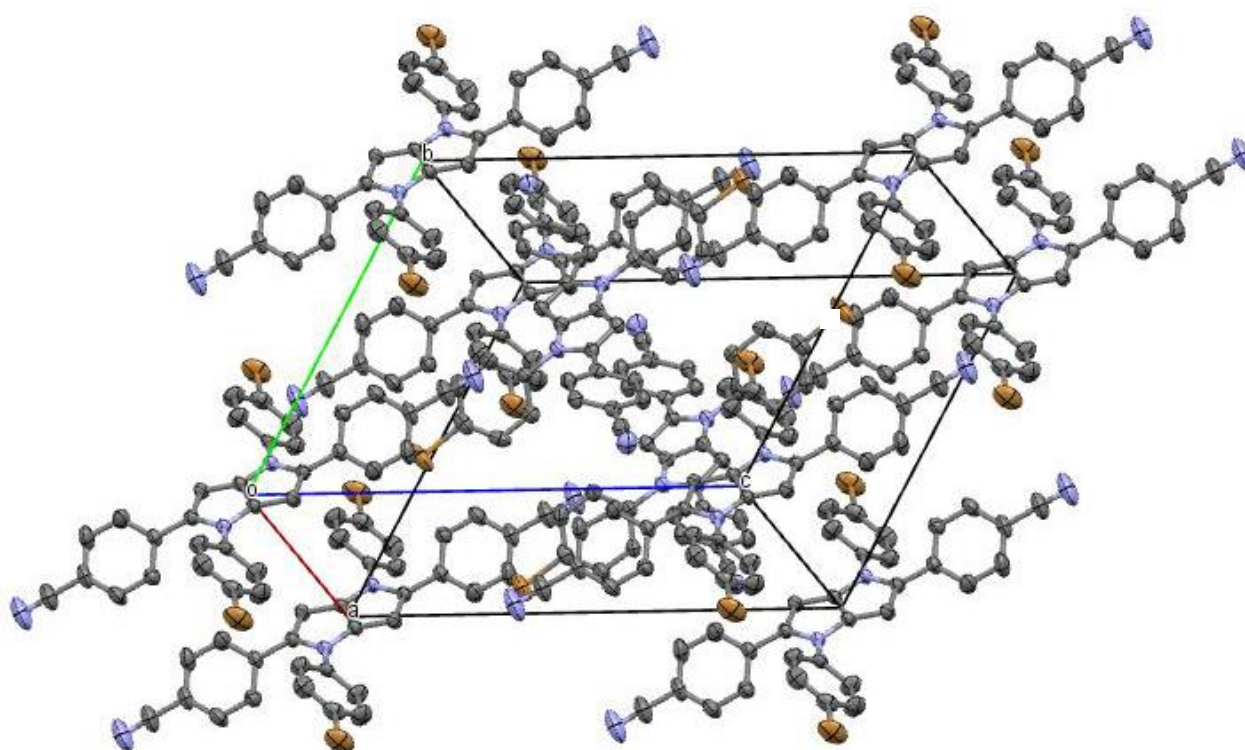

Supplement: NIHMS741747-supplement-Supporting_Information.pdf [file NIHMS741747-supplement-Supporting_Information.pdf]
